# Supplementary material
Source: MDPI journal article supplement (https://www.mdpi.com/2313-0105/2/1/5)
Supplement: s1 [file s1]

CUTEC-Institut  
GC-MS QP 5050 von Shimadzu

## Sample Information

Analyzed by : Kiefer  
Analyzed : 20.06.2014 10:22:17  
Sample Type : Unknown  
Sample Name : 14061702  
Sample ID : A-Kohle Pr. 3A001  
Injection Volume : 1.000  
Data File : D:\2014 Projekte\extern\3481 HHI\14061702\_A-Kohle Pr. 3A001\_20.06.2014\_2.qgd  
Method File : D:\2014 Projekte\extern\3481 HHI\Rxi\_5SilMS\_Screen\_CS2\_Isoprop.qgm  
Report File :  
Tuning File : C:\GCMSsolution\System\Tune1\14\_06\_03\_scan.qgt  
[Comment]  
14061702 Aktivkohle-Probe 3 A  
Projekt: Fraunhofer - HHI, 38 3481  
Probenahme am 17.06.2014  
Brandcontainer, Herzogenrath-Merlenheim  
Prozess: Schwelen  
Aktivkohle Typ G von Dräger  
14:45 - 15:20 Uhr, 17,7 L, 29,1 °C  
Lagerung: im Kühlschrank  
Extraktion am 19.06.2014 mit  
5 mL Schwefelkohlenstoff : Isopropanol (90:10)  
Säule: Rxi-5 Sil ms, 60 m, ID: 0,25 mm, Film: 0,25 µm  
von Retek, Ser.-Nr. 995332  
Det.: 1,5 kV, 30 - 500 amu  
Koffer 2 (K: 1,0512) durch: Herrn Köhring  
Modified by : Admin  
Modified : 24.06.2014 12:29:57

Chromatogram 14061702 D:\2014 Projekte\extern\3481 HHI\14061702\_A-Kohle Pr. 3A001\_20.06.2014\_2.qgd

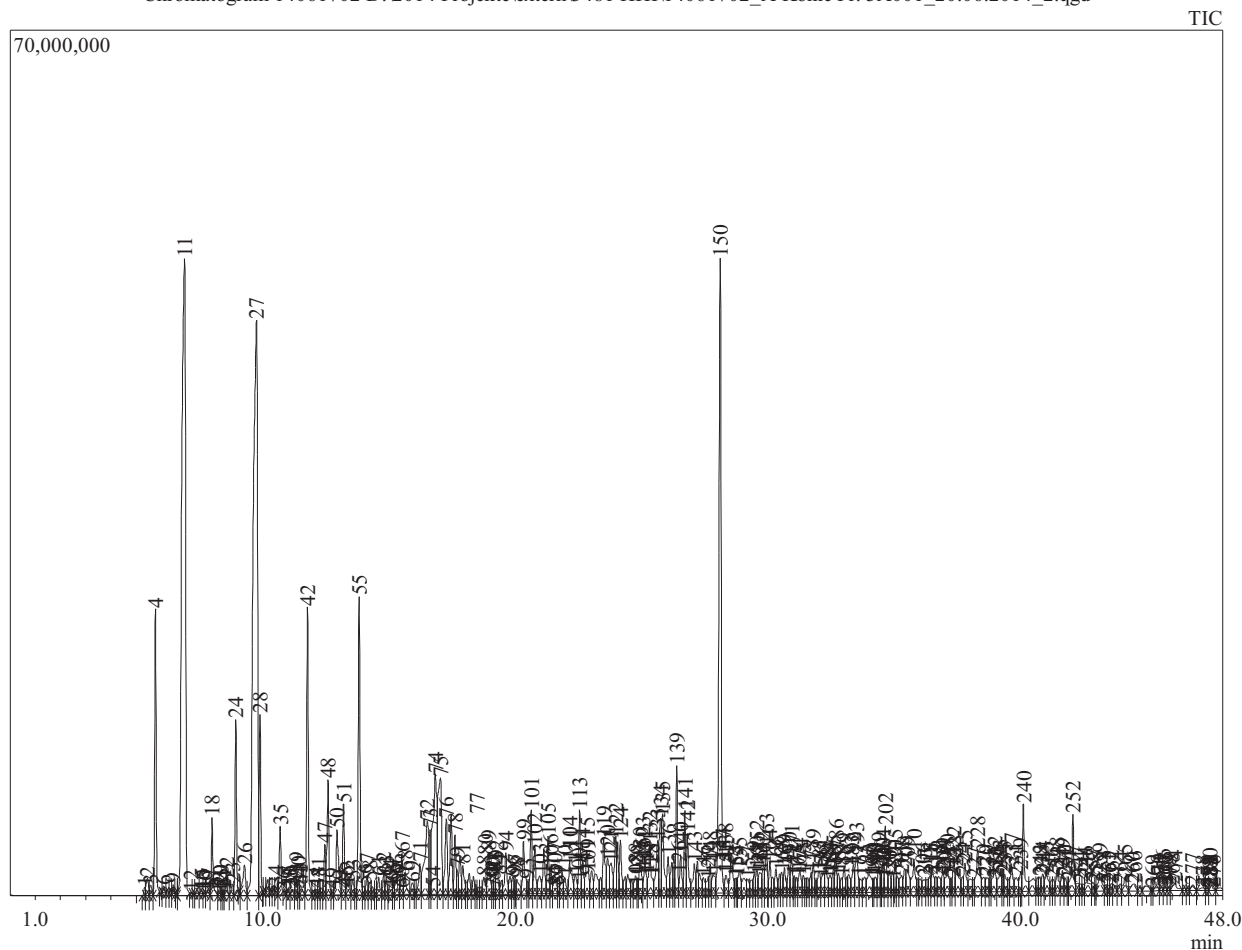

| Peak Report TIC |        |           |       |                                              |
|-----------------|--------|-----------|-------|----------------------------------------------|
| Peak#           | R.Time | Area      | Area% | Name                                         |
| 1               | 5.333  | 2618744   | 0.05  |                                              |
| 2               | 5.438  | 9566308   | 0.19  |                                              |
| 3               | 5.572  | 6037029   | 0.12  |                                              |
| 4               | 5.758  | 102671382 | 2.03  | Benzol (C6 H6); CAS: 71-43-2                 |
| 5               | 5.970  | 1238907   | 0.02  |                                              |
| 6               | 6.081  | 2314280   | 0.05  |                                              |
| 7               | 6.226  | 1041549   | 0.02  |                                              |
| 8               | 6.357  | 1448471   | 0.03  |                                              |
| 9               | 6.458  | 2381722   | 0.05  |                                              |
| 10              | 6.600  | 199523    | 0.00  |                                              |
| 11              | 6.913  | 553683838 | 10.93 | Carbonic acid, ethyl methyl ester (C4 H8 O3) |
| 12              | 7.154  | 277853    | 0.01  |                                              |
| 13              | 7.276  | 181991    | 0.00  |                                              |
| 14              | 7.428  | 1175168   | 0.02  |                                              |
| 15              | 7.584  | 1478742   | 0.03  |                                              |
| 16              | 7.682  | 303763    | 0.01  |                                              |
| 17              | 7.842  | 1037684   | 0.02  |                                              |
| 18              | 8.000  | 29625096  | 0.58  | Pyridin (C5 H5 N); CAS: 110-86-1             |
| 19              | 8.317  | 3496150   | 0.07  |                                              |
| 20              | 8.358  | 2447380   | 0.05  |                                              |
| 21              | 8.447  | 1718298   | 0.03  |                                              |
| 22              | 8.571  | 7241726   | 0.14  |                                              |
| 23              | 8.799  | 5206099   | 0.10  |                                              |
| 24              | 8.939  | 59578656  | 1.18  | Toluol (C7 H8); CAS: 108-88-3                |
| 25              | 9.058  | 60101     | 0.00  |                                              |
| 26              | 9.288  | 20844216  | 0.41  |                                              |
| 27              | 9.757  | 552926016 | 10.91 | Carbonic acid, diethyl ester (C5 H10 O3)     |
| 28              | 9.901  | 76738877  | 1.51  | Cyclopentanon (C5 H8 O); CAS: 120-92-3       |
| 29              | 10.008 | 614       | 0.00  |                                              |
| 30              | 10.108 | 899209    | 0.02  |                                              |
| 31              | 10.190 | 4550412   | 0.09  |                                              |
| 32              | 10.332 | 436345    | 0.01  |                                              |
| 33              | 10.450 | 2248632   | 0.04  |                                              |
| 34              | 10.508 | 1614526   | 0.03  |                                              |
| 35              | 10.696 | 28488393  | 0.56  | Pyridin, methyl- (C6 H7 N)                   |
| 36              | 10.835 | 258573    | 0.01  |                                              |
| 37              | 11.007 | 3018370   | 0.06  |                                              |
| 38              | 11.181 | 3473461   | 0.07  |                                              |
| 39              | 11.334 | 7560748   | 0.15  |                                              |
| 40              | 11.418 | 5174045   | 0.10  |                                              |
| 41              | 11.505 | 5368941   | 0.11  |                                              |
| 42              | 11.783 | 99462957  | 1.96  | Alken, verzweigt (C9 H18)                    |
| 43              | 12.033 | 2559453   | 0.05  |                                              |
| 44              | 12.115 | 2680016   | 0.05  |                                              |
| 45              | 12.259 | 2798971   | 0.06  |                                              |
| 46              | 12.308 | 3271414   | 0.06  |                                              |
| 47              | 12.469 | 18413606  | 0.36  | Pyridin, methyl- (C6 H7 N)                   |
| 48              | 12.594 | 46319718  | 0.91  | Ethylbenzol (C8 H10); CAS: 100-41-4          |
| 49              | 12.757 | 2285542   | 0.05  |                                              |
| 50              | 12.950 | 34957962  | 0.69  | Dimethylbenzol (m- + p-Xylol) (C8 H10)       |
| 51              | 13.204 | 32809309  | 0.65  | Hexannitril (C6 H11 N)                       |
| 52              | 13.355 | 7360459   | 0.15  |                                              |
| 53              | 13.564 | 7610301   | 0.15  |                                              |
| 54              | 13.690 | 1975966   | 0.04  |                                              |
| 55              | 13.822 | 114618368 | 2.26  | Styrol (C8 H8); CAS: 100-42-5                |
| 56              | 13.999 | 3753949   | 0.07  |                                              |
| 57              | 14.136 | 9005447   | 0.18  |                                              |
| 58              | 14.228 | 4611438   | 0.09  |                                              |
| 59              | 14.353 | 3515978   | 0.07  |                                              |
| 60              | 14.475 | 2187866   | 0.04  |                                              |
| 61              | 14.594 | 7913598   | 0.16  |                                              |
| 62              | 14.797 | 8266399   | 0.16  |                                              |
| 63              | 14.898 | 6245893   | 0.12  |                                              |
| 64              | 15.068 | 7372038   | 0.15  |                                              |
| 65              | 15.176 | 4234528   | 0.08  |                                              |
| 66              | 15.298 | 9536566   | 0.19  |                                              |
| 67              | 15.518 | 14916985  | 0.29  | Alken, verzweigt                             |
| 68              | 15.637 | 10568615  | 0.21  |                                              |
| 69              | 15.924 | 7575163   | 0.15  |                                              |
| 70              | 16.042 | 1746127   | 0.03  |                                              |
| 71              | 16.227 | 16014847  | 0.32  |                                              |
| 72              | 16.520 | 65611329  | 1.29  |                                              |
| 73              | 16.634 | 25155903  | 0.50  |                                              |
| 74              | 16.838 | 103725982 | 2.05  | Trimethylbenzol (C9 H12)                     |

| Peak# | R.Time | Area      | Area% | Name                                  |
|-------|--------|-----------|-------|---------------------------------------|
| 75    | 17.042 | 96832072  | 1.91  | Dioxolan-on (C3 H4 O3); CAS: 96-49-1  |
| 76    | 17.278 | 40530226  | 0.80  | Phenol (C6 H6 O); CAS: 108-95-2       |
| 77    | 17.466 | 36249303  | 0.72  | Benzonitril (C7 H5 N)                 |
| 78    | 17.615 | 22149818  | 0.44  | Alken, verzweigt (C10 H20)            |
| 79    | 17.693 | 7165433   | 0.14  |                                       |
| 80    | 17.810 | 17605213  | 0.35  |                                       |
| 81    | 17.930 | 14070262  | 0.28  |                                       |
| 82    | 18.075 | 4739734   | 0.09  |                                       |
| 83    | 18.182 | 10057358  | 0.20  |                                       |
| 84    | 18.344 | 7348844   | 0.15  |                                       |
| 85    | 18.434 | 4100248   | 0.08  |                                       |
| 86    | 18.544 | 3129910   | 0.06  |                                       |
| 87    | 18.649 | 2719758   | 0.05  |                                       |
| 88    | 18.760 | 9744709   | 0.19  |                                       |
| 89    | 18.936 | 22551912  | 0.45  | Hexanol, ethyl- (C8 H18 O)            |
| 90    | 19.127 | 5580357   | 0.11  |                                       |
| 91    | 19.200 | 7397021   | 0.15  |                                       |
| 92    | 19.285 | 13215311  | 0.26  |                                       |
| 93    | 19.451 | 5959686   | 0.12  |                                       |
| 94    | 19.626 | 20156996  | 0.40  | Inden (C9 H8); CAS: 95-13-6           |
| 95    | 19.797 | 8563619   | 0.17  |                                       |
| 96    | 19.909 | 6773729   | 0.13  |                                       |
| 97    | 19.990 | 6647134   | 0.13  |                                       |
| 98    | 20.062 | 9854811   | 0.19  |                                       |
| 99    | 20.332 | 27066544  | 0.53  | Acetophenon (C8 H8 O); CAS: 98-86-2   |
| 100   | 20.488 | 4402295   | 0.09  |                                       |
| 101   | 20.633 | 30166434  | 0.60  | Alken, verzweigt (C11 H22)            |
| 102   | 20.774 | 19876736  | 0.39  | Alken, verzweigt (C11 H22)            |
| 103   | 20.974 | 12895902  | 0.25  |                                       |
| 104   | 21.137 | 21041492  | 0.42  | Undecen (C11 H22)                     |
| 105   | 21.303 | 21198307  | 0.42  | Benzoic acid, methyl ester (C8 H8 O2) |
| 106   | 21.413 | 9929019   | 0.20  |                                       |
| 107   | 21.557 | 11142876  | 0.22  |                                       |
| 108   | 21.729 | 2656573   | 0.05  |                                       |
| 109   | 21.857 | 10341616  | 0.20  |                                       |
| 110   | 21.959 | 8387720   | 0.17  |                                       |
| 111   | 22.156 | 21037199  | 0.42  |                                       |
| 112   | 22.382 | 11129228  | 0.22  |                                       |
| 113   | 22.549 | 30009906  | 0.59  | Benzoylformic acid (C8 H6 O3)         |
| 114   | 22.671 | 13648494  | 0.27  |                                       |
| 115   | 22.839 | 26877112  | 0.53  |                                       |
| 116   | 23.028 | 12091398  | 0.24  |                                       |
| 117   | 23.168 | 17581690  | 0.35  |                                       |
| 118   | 23.382 | 7668105   | 0.15  |                                       |
| 119   | 23.507 | 28425893  | 0.56  |                                       |
| 120   | 23.659 | 17364145  | 0.34  |                                       |
| 121   | 23.797 | 19073950  | 0.38  |                                       |
| 122   | 23.980 | 27756289  | 0.55  |                                       |
| 123   | 24.048 | 13700079  | 0.27  |                                       |
| 124   | 24.168 | 24143400  | 0.48  |                                       |
| 125   | 24.358 | 8567264   | 0.17  |                                       |
| 126   | 24.453 | 11067941  | 0.22  |                                       |
| 127   | 24.602 | 6022948   | 0.12  |                                       |
| 128   | 24.772 | 9937332   | 0.20  |                                       |
| 129   | 24.851 | 4753436   | 0.09  |                                       |
| 130   | 24.954 | 18880620  | 0.37  |                                       |
| 131   | 25.138 | 18047962  | 0.36  |                                       |
| 132   | 25.337 | 27796192  | 0.55  |                                       |
| 133   | 25.641 | 29751840  | 0.59  |                                       |
| 134   | 25.756 | 37642533  | 0.74  |                                       |
| 135   | 25.835 | 40034383  | 0.79  |                                       |
| 136   | 26.055 | 16242350  | 0.32  |                                       |
| 137   | 26.199 | 14190729  | 0.28  |                                       |
| 138   | 26.282 | 13896646  | 0.27  |                                       |
| 139   | 26.393 | 43490651  | 0.86  |                                       |
| 140   | 26.554 | 16788989  | 0.33  |                                       |
| 141   | 26.718 | 27228668  | 0.54  |                                       |
| 142   | 26.818 | 24964804  | 0.49  |                                       |
| 143   | 27.093 | 18346164  | 0.36  |                                       |
| 144   | 27.213 | 12666576  | 0.25  |                                       |
| 145   | 27.298 | 10063625  | 0.20  |                                       |
| 146   | 27.449 | 7934435   | 0.16  |                                       |
| 147   | 27.647 | 9078101   | 0.18  |                                       |
| 148   | 27.720 | 11224270  | 0.22  |                                       |
| 149   | 27.834 | 13753965  | 0.27  |                                       |
| 150   | 28.118 | 308206937 | 6.08  | Biphenyl (C12 H10); CAS: 92-52-4      |

| Peak# | R.Time | Area     | Area% | Name |
|-------|--------|----------|-------|------|
| 151   | 28.347 | 11704289 | 0.23  |      |
| 152   | 28.553 | 23018736 | 0.45  |      |
| 153   | 28.720 | 5005603  | 0.10  |      |
| 154   | 28.781 | 4215188  | 0.08  |      |
| 155   | 28.876 | 13660975 | 0.27  |      |
| 156   | 29.053 | 12203794 | 0.24  |      |
| 157   | 29.209 | 6803140  | 0.13  |      |
| 158   | 29.345 | 7294970  | 0.14  |      |
| 159   | 29.458 | 7766733  | 0.15  |      |
| 160   | 29.572 | 11381942 | 0.22  |      |
| 161   | 29.682 | 12361754 | 0.24  |      |
| 162   | 29.829 | 13767754 | 0.27  |      |
| 163   | 29.950 | 20597372 | 0.41  |      |
| 164   | 30.082 | 13540742 | 0.27  |      |
| 165   | 30.191 | 7037398  | 0.14  |      |
| 166   | 30.326 | 11625661 | 0.23  |      |
| 167   | 30.474 | 8817858  | 0.17  |      |
| 168   | 30.547 | 7670793  | 0.15  |      |
| 169   | 30.657 | 11730992 | 0.23  |      |
| 170   | 30.831 | 12102899 | 0.24  |      |
| 171   | 30.944 | 15299310 | 0.30  |      |
| 172   | 31.045 | 6103028  | 0.12  |      |
| 173   | 31.123 | 5865589  | 0.12  |      |
| 174   | 31.269 | 12867101 | 0.25  |      |
| 175   | 31.412 | 8302144  | 0.16  |      |
| 176   | 31.506 | 4583873  | 0.09  |      |
| 177   | 31.571 | 6572998  | 0.13  |      |
| 178   | 31.723 | 9401562  | 0.19  |      |
| 179   | 31.801 | 12575525 | 0.25  |      |
| 180   | 31.917 | 3892326  | 0.08  |      |
| 181   | 32.038 | 13561583 | 0.27  |      |
| 182   | 32.217 | 11834511 | 0.23  |      |
| 183   | 32.301 | 13391071 | 0.26  |      |
| 184   | 32.460 | 8638344  | 0.17  |      |
| 185   | 32.606 | 11851311 | 0.23  |      |
| 186   | 32.694 | 15749075 | 0.31  |      |
| 187   | 32.793 | 8358904  | 0.16  |      |
| 188   | 32.944 | 6092931  | 0.12  |      |
| 189   | 33.022 | 11365006 | 0.22  |      |
| 190   | 33.136 | 5316285  | 0.10  |      |
| 191   | 33.200 | 9597441  | 0.19  |      |
| 192   | 33.392 | 14431408 | 0.28  |      |
| 193   | 33.520 | 22712528 | 0.45  |      |
| 194   | 33.639 | 8626871  | 0.17  |      |
| 195   | 33.832 | 9416713  | 0.19  |      |
| 196   | 34.011 | 18226658 | 0.36  |      |
| 197   | 34.179 | 4162086  | 0.08  |      |
| 198   | 34.256 | 7889337  | 0.16  |      |
| 199   | 34.396 | 12242388 | 0.24  |      |
| 200   | 34.493 | 6523126  | 0.13  |      |
| 201   | 34.578 | 11352146 | 0.22  |      |
| 202   | 34.654 | 29034742 | 0.57  |      |
| 203   | 34.816 | 9030515  | 0.18  |      |
| 204   | 34.938 | 9487338  | 0.19  |      |
| 205   | 35.038 | 12790558 | 0.25  |      |
| 206   | 35.117 | 6528526  | 0.13  |      |
| 207   | 35.302 | 11234641 | 0.22  |      |
| 208   | 35.419 | 10367686 | 0.20  |      |
| 209   | 35.508 | 16920924 | 0.33  |      |
| 210   | 35.793 | 20986302 | 0.41  |      |
| 211   | 35.930 | 5176937  | 0.10  |      |
| 212   | 36.028 | 7400076  | 0.15  |      |
| 213   | 36.194 | 7990876  | 0.16  |      |
| 214   | 36.320 | 6982165  | 0.14  |      |
| 215   | 36.428 | 7602796  | 0.15  |      |
| 216   | 36.518 | 10538618 | 0.21  |      |
| 217   | 36.653 | 7535138  | 0.15  |      |
| 218   | 36.761 | 10228382 | 0.20  |      |
| 219   | 36.933 | 11563017 | 0.23  |      |
| 220   | 37.115 | 17106296 | 0.34  |      |
| 221   | 37.246 | 4201536  | 0.08  |      |
| 222   | 37.362 | 14163573 | 0.28  |      |
| 223   | 37.449 | 21084305 | 0.42  |      |
| 224   | 37.727 | 5598972  | 0.11  |      |
| 225   | 37.808 | 15857994 | 0.31  |      |
| 226   | 38.013 | 10682433 | 0.21  |      |

| Peak# | R.Time | Area       | Area%  | Name |
|-------|--------|------------|--------|------|
| 227   | 38.149 | 4399091    | 0.09   |      |
| 228   | 38.311 | 30118770   | 0.59   |      |
| 229   | 38.534 | 9656519    | 0.19   |      |
| 230   | 38.673 | 8541959    | 0.17   |      |
| 231   | 38.804 | 6569255    | 0.13   |      |
| 232   | 38.992 | 16824868   | 0.33   |      |
| 233   | 39.199 | 15523151   | 0.31   |      |
| 234   | 39.317 | 4399331    | 0.09   |      |
| 235   | 39.378 | 10962877   | 0.22   |      |
| 236   | 39.558 | 4904949    | 0.10   |      |
| 237   | 39.658 | 13995695   | 0.28   |      |
| 238   | 39.834 | 9902910    | 0.20   |      |
| 239   | 40.013 | 9981611    | 0.20   |      |
| 240   | 40.121 | 37489204   | 0.74   |      |
| 241   | 40.509 | 15812023   | 0.31   |      |
| 242   | 40.680 | 6030924    | 0.12   |      |
| 243   | 40.760 | 6312951    | 0.12   |      |
| 244   | 40.888 | 9222602    | 0.18   |      |
| 245   | 41.026 | 13438793   | 0.27   |      |
| 246   | 41.251 | 6020343    | 0.12   |      |
| 247   | 41.307 | 4977557    | 0.10   |      |
| 248   | 41.456 | 12162245   | 0.24   |      |
| 249   | 41.663 | 10455715   | 0.21   |      |
| 250   | 41.766 | 6803390    | 0.13   |      |
| 251   | 41.895 | 2873543    | 0.06   |      |
| 252   | 42.083 | 33117782   | 0.65   |      |
| 253   | 42.258 | 5775977    | 0.11   |      |
| 254   | 42.383 | 3225381    | 0.06   |      |
| 255   | 42.469 | 3382997    | 0.07   |      |
| 256   | 42.613 | 10579429   | 0.21   |      |
| 257   | 42.869 | 4564626    | 0.09   |      |
| 258   | 42.958 | 1563421    | 0.03   |      |
| 259   | 43.147 | 14111961   | 0.28   |      |
| 260   | 43.400 | 3697351    | 0.07   |      |
| 261   | 43.508 | 2026600    | 0.04   |      |
| 262   | 43.600 | 3803431    | 0.08   |      |
| 263   | 43.676 | 4644806    | 0.09   |      |
| 264   | 43.955 | 5411193    | 0.11   |      |
| 265   | 44.142 | 9391300    | 0.19   |      |
| 266   | 44.518 | 8858056    | 0.17   |      |
| 267   | 44.692 | 2891028    | 0.06   |      |
| 268   | 44.991 | 6930811    | 0.14   |      |
| 269   | 45.217 | 1052180    | 0.02   |      |
| 270   | 45.460 | 3855381    | 0.08   |      |
| 271   | 45.557 | 2568436    | 0.05   |      |
| 272   | 45.747 | 2493593    | 0.05   |      |
| 273   | 45.879 | 2029395    | 0.04   |      |
| 274   | 46.117 | 8734756    | 0.17   |      |
| 275   | 46.505 | 1631402    | 0.03   |      |
| 276   | 46.608 | 1327194    | 0.03   |      |
| 277   | 46.791 | 4139061    | 0.08   |      |
| 278   | 47.227 | 3485662    | 0.07   |      |
| 279   | 47.392 | 1308496    | 0.03   |      |
| 280   | 47.543 | 4929457    | 0.10   |      |
| 281   | 47.919 | 2850187    | 0.06   |      |
| 282   | 48.110 | 848211     | 0.02   |      |
| 283   | 48.355 | 688338     | 0.01   |      |
| 284   | 48.485 | 463577     | 0.01   |      |
| 285   | 48.576 | 560802     | 0.01   |      |
| 286   | 48.694 | 401347     | 0.01   |      |
| 287   | 48.836 | 205010     | 0.00   |      |
|       |        | 5067184787 | 100.00 |      |

## Method

[Comment]

35.1

6

20.8

|      |                 |                |
|------|-----------------|----------------|
| Rate | Temperature(°C) | Keep Time(min) |
| -    | 40.0            | 5.00           |
| 5.0  | 120.0           | 0.00           |
| 10.0 | 300.0           | 10.00          |

|      |               |                |
|------|---------------|----------------|
| Rate | Pressure(kPa) | Keep Time(min) |
| -    | 191.0         | 5.00           |
| 2.0  | 223.0         | 0.00           |
| 4.0  | 295.0         | 10.00          |

250.00

[GC Program]

[GCMS-QP5050A]

|                    |            |
|--------------------|------------|
| Acquisition Mode   | :Scan      |
| Interface Temp.    | :300.00 °C |
| Solvent Cut Time   | :0.00 min  |
| Detector Gain Mode | :Absolute  |
| Detector Gain      | :1.50 kV   |
| Threshold          | :1000      |
| Sampling Rate      | :0.50 sec  |

[Scan Group]

| No. | Start Time(min) | End Time(min) | Start m/z | End m/z |
|-----|-----------------|---------------|-----------|---------|
| 1   | 0.00            | 49.00         | 30.00     | 500.00  |

Sample Inlet Unit :GC

[MS Program]

| Use MS Program | :ON       |              |       |
|----------------|-----------|--------------|-------|
| No.            | Time(min) | Command      | Value |
| 1              | 0.10      | Filament OFF |       |
| 2              | 5.30      | Filament ON  |       |
