# Supplementary material
Source: MDPI journal article supplement (https://www.mdpi.com/2313-0105/2/1/5)
Supplement: s1 [file s1]

CUTEC-Institut  
GC-MS QP 5050 von Shimadzu

## Sample Information

Analyzed by : Kiefer  
Analyzed : 20.06.2014 12:28:48  
Sample Type : Unknown  
Sample Name : 14061703  
Sample ID : A-Kohle Pr. 5A001  
Injection Volume : 1.000  
Data File : D:\2014 Projekte\extern\3481 HHI\14061703\_A-Kohle Pr. 5A001\_20.06.2014\_4.qgd  
Method File : D:\2014 Projekte\extern\3481 HHI\Rxi\_5SilMS\_Screen\_CS2\_Isoprop.qgm  
Report File :  
Tuning File : C:\GCMSsolution\System\Tune1\14\_06\_03\_scan.qgt  
[Comment]  
14061703 Aktivkohle-Probe 5 A  
Projekt: Fraunhofer - HHI, 38 3481  
Probenahme am 17.06.2014  
Brandcontainer, Herzogenrath-Merlenheim  
Prozess: Brand  
Aktivkohle Typ G von Dräger  
16:23 - 16:37 Uhr, 7,8 L, 28,9 °C  
Lagerung: im Kühlschrank  
Extraktion am 19.06.2014 mit  
5 mL Schwefelkohlenstoff : Isopropanol (90:10)  
Säule: Rxi-5 Sil ms, 60 m, ID: 0,25 mm, Film: 0,25 µm  
von Retek, Ser.-Nr. 995332  
Det.: 1,5 kV, 30 - 500 amu  
Koffer 2 (K: 1,0512) durch: Herrn Köhring  
Modified by : Admin  
Modified : 24.06.2014 09:28:32

Chromatogram 14061703 D:\2014 Projekte\extern\3481 HHI\14061703\_A-Kohle Pr. 5A001\_20.06.2014\_4.qgd

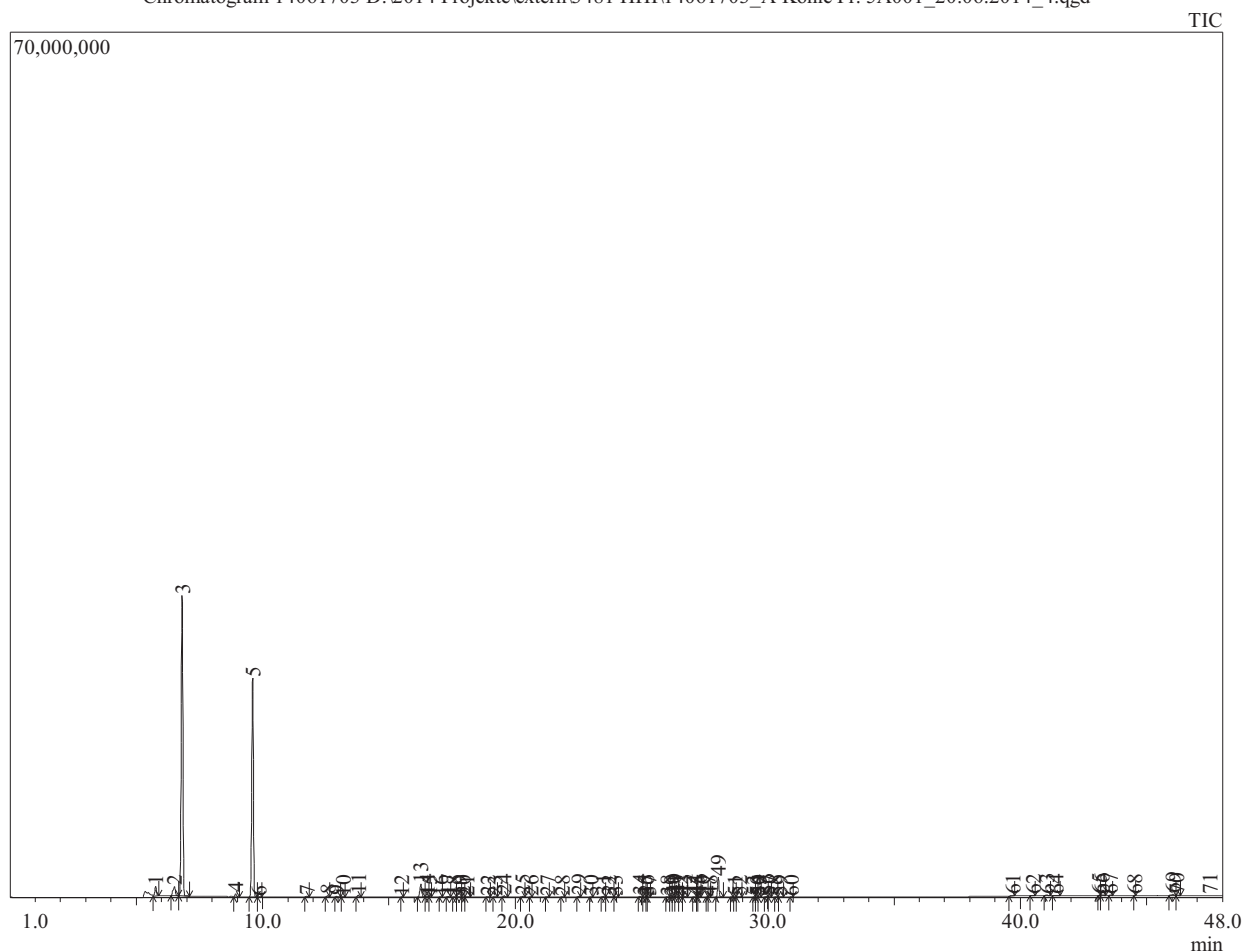

## Peak Report TIC

| Peak# | R.Time | Area      | Area%  | Name                                         |
|-------|--------|-----------|--------|----------------------------------------------|
| 1     | 5.767  | 3239902   | 1.41   | Benzol (C6 H6); CAS: 71-43-2                 |
| 2     | 6.511  | 4752001   | 2.07   | Ethandiol, Ethylen glykol (C2 H6 O2)         |
| 3     | 6.818  | 119922706 | 52.21  | Carbonic acid, ethyl methyl ester (C4 H8 O3) |
| 4     | 8.934  | 949987    | 0.41   | Toluol (C7 H8); CAS: 108-88-3                |
| 5     | 9.606  | 79476347  | 34.60  | Carbonic acid, diethyl ester (C5 H10 O3)     |
| 6     | 9.842  | 77298     | 0.03   |                                              |
| 7     | 11.755 | 275261    | 0.12   |                                              |
| 8     | 12.576 | 412409    | 0.18   | Ethylbenzol (C8 H10)                         |
| 9     | 12.936 | 241034    | 0.10   | Dimethylbenzol (m- + p-Xylol); (C8 H10)      |
| 10    | 13.185 | 72996     | 0.03   | Phenylethyne (C8 H6)                         |
| 11    | 13.787 | 700823    | 0.31   | Styrol (C8 H8); CAS: 100-42-5                |
| 12    | 15.509 | 24382     | 0.01   |                                              |
| 13    | 16.269 | 5521563   | 2.40   | Dioxolan-on (C3 H4 O3)                       |
| 14    | 16.523 | 302771    | 0.13   | Benzaldehyd (C7 H6 O); CAS: 100-52-7         |
| 15    | 16.625 | 30666     | 0.01   |                                              |
| 16    | 17.049 | 63470     | 0.03   |                                              |
| 17    | 17.348 | 159922    | 0.07   | Ethynyl pyridin (C7 H5 N)                    |
| 18    | 17.587 | 102506    | 0.04   |                                              |
| 19    | 17.766 | 94909     | 0.04   |                                              |
| 20    | 17.942 | 36879     | 0.02   |                                              |
| 21    | 18.082 | 159337    | 0.07   |                                              |
| 22    | 18.906 | 95043     | 0.04   |                                              |
| 23    | 19.199 | 113781    | 0.05   |                                              |
| 24    | 19.560 | 513987    | 0.22   | Ethanol, (methylethoxy)- (C5 H12 O2)         |
| 25    | 20.300 | 272257    | 0.12   | Acetophenon (C8 H8 O)                        |
| 26    | 20.615 | 34831     | 0.02   |                                              |
| 27    | 21.282 | 165752    | 0.07   | Benzoic acid, methyl ester (C8 H8 O2)        |
| 28    | 21.867 | 40994     | 0.02   |                                              |
| 29    | 22.525 | 264150    | 0.12   | Benzeneacetic acid, methyl ester (C9 H8 O3)  |
| 30    | 23.000 | 28395     | 0.01   |                                              |
| 31    | 23.492 | 248744    | 0.11   | Benzoic acid, ethyl ester (C9 H10 O2)        |
| 32    | 23.700 | 4058      | 0.00   |                                              |
| 33    | 23.966 | 120969    | 0.05   |                                              |
| 34    | 24.948 | 217859    | 0.09   |                                              |
| 35    | 25.124 | 99083     | 0.04   |                                              |
| 36    | 25.200 | 48441     | 0.02   |                                              |
| 37    | 25.290 | 74180     | 0.03   |                                              |
| 38    | 26.035 | 105343    | 0.05   |                                              |
| 39    | 26.192 | 102221    | 0.04   |                                              |
| 40    | 26.269 | 316175    | 0.14   |                                              |
| 41    | 26.379 | 394434    | 0.17   |                                              |
| 42    | 26.545 | 115183    | 0.05   |                                              |
| 43    | 26.708 | 316049    | 0.14   | Alken, verzweigt (C13 H26)                   |
| 44    | 27.117 | 104314    | 0.05   |                                              |
| 45    | 27.204 | 79289     | 0.03   |                                              |
| 46    | 27.283 | 131270    | 0.06   |                                              |
| 47    | 27.608 | 45971     | 0.02   |                                              |
| 48    | 27.676 | 111609    | 0.05   |                                              |
| 49    | 28.042 | 6114087   | 2.66   | Biphenyl (C12 H10)                           |
| 50    | 28.569 | 26496     | 0.01   |                                              |
| 51    | 28.705 | 29311     | 0.01   |                                              |
| 52    | 28.870 | 99955     | 0.04   |                                              |
| 53    | 29.442 | 41530     | 0.02   |                                              |
| 54    | 29.569 | 90466     | 0.04   |                                              |
| 55    | 29.674 | 55491     | 0.02   |                                              |
| 56    | 29.944 | 171180    | 0.07   |                                              |
| 57    | 30.080 | 42925     | 0.02   |                                              |
| 58    | 30.324 | 58473     | 0.03   |                                              |
| 59    | 30.467 | 74632     | 0.03   |                                              |
| 60    | 30.936 | 63665     | 0.03   |                                              |
| 61    | 39.688 | 147151    | 0.06   |                                              |
| 62    | 40.501 | 149540    | 0.07   |                                              |
| 63    | 41.037 | 252950    | 0.11   |                                              |
| 64    | 41.407 | 121130    | 0.05   |                                              |
| 65    | 43.117 | 33042     | 0.01   |                                              |
| 66    | 43.219 | 104028    | 0.05   |                                              |
| 67    | 43.564 | 49008     | 0.02   |                                              |
| 68    | 44.521 | 17245     | 0.01   |                                              |
| 69    | 46.039 | 586790    | 0.26   |                                              |
| 70    | 46.200 | 170239    | 0.07   |                                              |
| 71    | 48.358 | 394538    | 0.17   |                                              |
|       |        | 229675423 | 100.00 |                                              |

## Method

[Comment]

35.1

6

20.8

|      |                 |                |
|------|-----------------|----------------|
| Rate | Temperature(°C) | Keep Time(min) |
| -    | 40.0            | 5.00           |
| 5.0  | 120.0           | 0.00           |
| 10.0 | 300.0           | 10.00          |

|      |               |                |
|------|---------------|----------------|
| Rate | Pressure(kPa) | Keep Time(min) |
| -    | 191.0         | 5.00           |
| 2.0  | 223.0         | 0.00           |
| 4.0  | 295.0         | 10.00          |

250.00

[GC Program]

[GCMS-QP5050A]

|                    |            |
|--------------------|------------|
| Acquisition Mode   | :Scan      |
| Interface Temp.    | :300.00 °C |
| Solvent Cut Time   | :0.00 min  |
| Detector Gain Mode | :Absolute  |
| Detector Gain      | :1.50 kV   |
| Threshold          | :1000      |
| Sampling Rate      | :0.50 sec  |

[Scan Group]

| No. | Start Time(min) | End Time(min) | Start m/z | End m/z |
|-----|-----------------|---------------|-----------|---------|
| 1   | 0.00            | 49.00         | 30.00     | 500.00  |

Sample Inlet Unit :GC

[MS Program]

| Use MS Program | :ON       |              |       |
|----------------|-----------|--------------|-------|
| No.            | Time(min) | Command      | Value |
| 1              | 0.10      | Filament OFF |       |
| 2              | 5.30      | Filament ON  |       |
