# Supplementary material
Source: MDPI journal article supplement (https://www.mdpi.com/2313-0105/2/1/5)
Supplement: s1 [file s1]

CUTEC-Institut  
GC-MS QP 5050 von Shimadzu

## Sample Information

Analyzed by : Kiefer  
Analyzed : 05.12.2014 17:29:50  
Sample Type : Unknown  
Sample Name : 14112711  
Sample ID : A-Kohle\_A  
Injection Volume : 1.000  
Data File : D:\2014 Projekte\extern\3481 HHI\14112711\_A-Kohle\_A\_05.12.2014\_7.qgd  
Method File : D:\2014 Projekte\extern\3515 HHI\Rxi\_5SilMS\_Screen\_CS2\_Isoprop2.qgm  
Report File :  
Tuning File : C:\GCMSsolution\System\Tune1\14\_06\_03\_scan.qgt  
[Comment]  
14112711 A-Kohle 1, Teil A  
Projekt: Fraunhofer HHI, 38 3481  
Probenahme vom 25.11.2014; 17:22 bis 17:34 Uhr  
15,8 L, 6,6 °C, 12 min, Koffer 2 (K: 1,0499)  
Aktivkohle Typ G von Dräger, Teil A am 04.12.2014  
mit 5 mL Extraktionsmittel  
Schwefelkohlenstoff : Isopropanol (90:10) versetzt  
und 1 Stunde geschüttelt  
Säule: Rxi-5 Sil ms, 60 m, ID: 0,25 mm, Film: 0,25 µm  
von Restek, Ser.-Nr. 995332  
Det.: 1,55 kV  
Modified by : Admin  
Modified : 08.12.2014 14:42:10

Chromatogram 14112711 D:\2014 Projekte\extern\3481 HHI\14112711\_A-Kohle\_A\_05.12.2014\_7.qgd

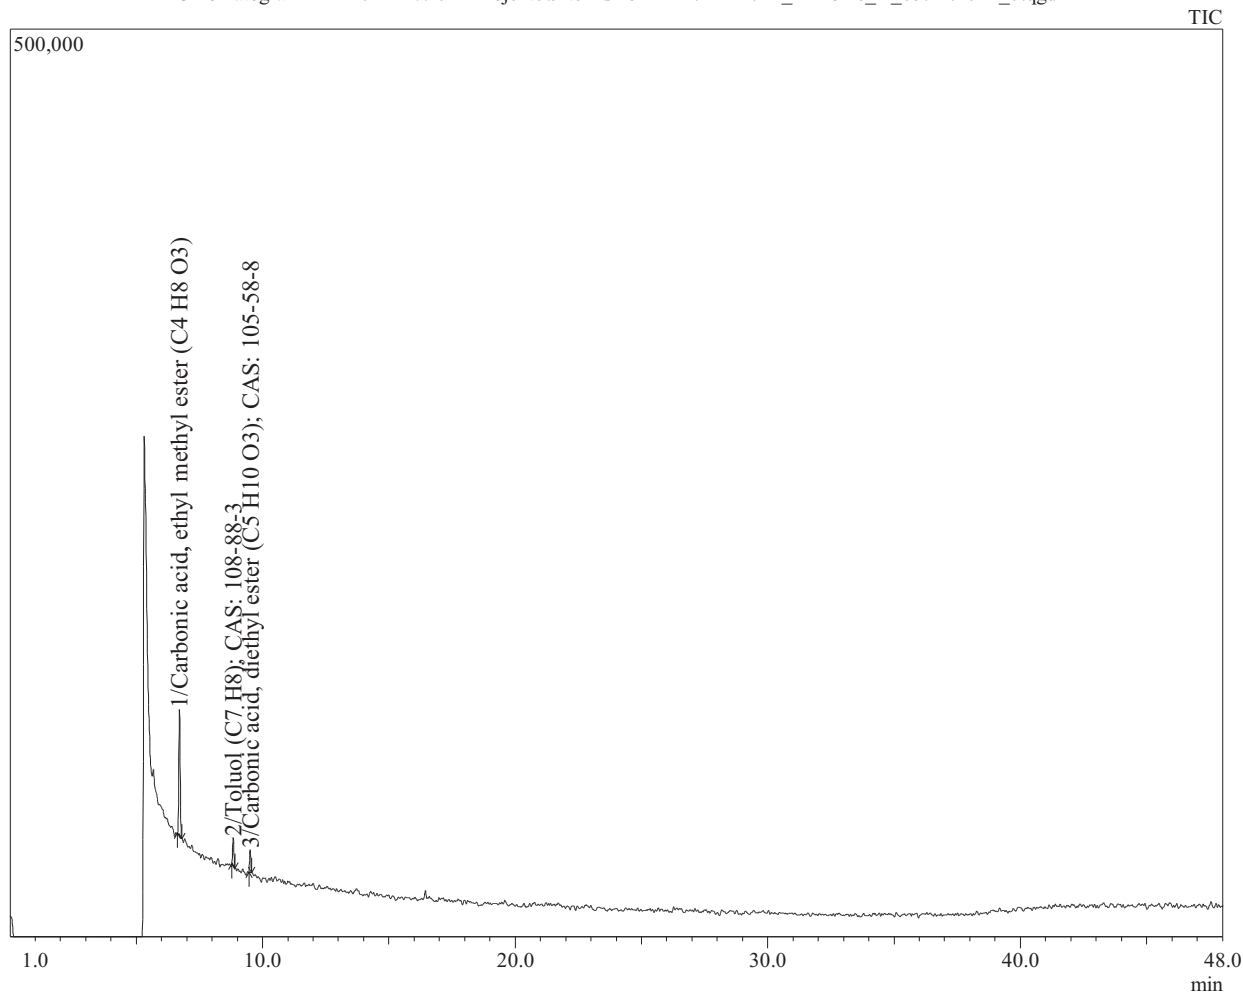

## Peak Report TIC

| Peak# | R.Time | Area   | Area%  | Name                                                    |
|-------|--------|--------|--------|---------------------------------------------------------|
| 1     | 6.707  | 256678 | 73.01  | Carbonic acid, ethyl methyl ester (C4 H8 O3)            |
| 2     | 8.838  | 53310  | 15.16  | Toluol (C7 H8); CAS: 108-88-3                           |
| 3     | 9.509  | 41568  | 11.82  | Carbonic acid, diethyl ester (C5 H10 O3); CAS: 105-58-8 |
|       |        | 351556 | 100.00 |                                                         |

## Method

Trärgas: Helium

Injektionsmethode: Split/Splitless

Säule: Rxi-5 Sil ms, 60 m, ID: 0,25 mm, Film: 0,25 µm  
von Restek

35.1

6

20.8

| Rate | Temperature(°C) | Keep Time(min) |
|------|-----------------|----------------|
| -    | 40.0            | 5.00           |
| 5.0  | 120.0           | 0.00           |
| 10.0 | 300.0           | 10.00          |

| Rate | Pressure(kPa) | Keep Time(min) |
|------|---------------|----------------|
| -    | 191.0         | 5.00           |
| 2.0  | 223.0         | 0.00           |
| 4.0  | 295.0         | 10.00          |

250.00

[GC Program]

[GCMS-QP5050A]

Acquisition Mode :Scan  
Interface Temp. :300.00 °C  
Solvent Cut Time :0.00 min  
Detector Gain Mode :Absolute  
Detector Gain :1.55 kV  
Threshold :1000  
Sampling Rate :0.50 sec

[Scan Group]

| No. | Start Time(min) | End Time(min) | Start m/z | End m/z |
|-----|-----------------|---------------|-----------|---------|
| 1   | 0.00            | 49.00         | 30.00     | 500.00  |

Sample Inlet Unit :GC

[MS Program]

| No. | Time(min) | Command      | Value |
|-----|-----------|--------------|-------|
| 1   | 0.10      | Filament OFF |       |
| 2   | 5.30      | Filament ON  |       |
